# Supplementary material for: CAMELE: Collocation-Analyzed Multi-source Ensembled Land Evapotranspiration Data
Source: Copernicus journal article supplement (doi:10.5194/essd-2021-456), 2022-03-01
Supplement: Supplementary file 1 [file S1-Information of FLUXNET sites.docx]

**Error Characterization of Global Land Evapotranspiration Products: A Collocation approach**

Changming Li1, Hanbo Yang1*, Wencong Yang1, Ziwei Liu1, Yao Jia1, Sien Li2, Dawen Yang1

1State Key Laboratory of Hydroscience and Engineering, Department of Hydraulic Engineering, Tsinghua University. Beijing 100084, China

2Center for Agricultural Water Research in China, China Agricultural University, Beijing 100083, China

*Correspondence: Hanbo Yang ([yanghanbo@tsinghua.edu.cn](mailto:yanghanbo@tsinghua.edu.cn) )

# S1: Information of FLUXNET sites

**TABLE** Information about the 82 sites from the FLUNXET Tier 1 dataset.

| **SITE ID** | **PFTs** | **LAT(°)** | **LON(°)** | ***z* (m)** | ***h* (m)** | **Elevation (m)** | **MAT**  **(K)** | **MAP**  **(mm/y)** | **Time coverage** | **Reference** |
| --- | --- | --- | --- | --- | --- | --- | --- | --- | --- | --- |
| AR-SLu | MF | -33.46 | -66.46 | 11 | 7 |  |  | 400 | 07~13 | Ulke et al. (2015) |
| AT-Neu | GRA | 47.12 | 11.32 | 3 | 1.0 | 970 | 6.50 | 852.12 | 08~14 | Gilmanov et al. (2007) |
| AU-ASM | ENF | -22.28 | 133.25 | 11.6 | 6.5 |  |  |  | 08~14 | Barraza et al. (2017) |
| AU-Cpr | SAV | -34.00 | 140.59 | 20 | 4.0 |  |  |  | 11~13 | Van Gorsel et al. (2016) |
| AU-DaP | GRA | -14.06 | 131.32 | 15 | 0.3 |  | 27.25 | 983.78 | 11~14 | Zhuang et al. (2016) |
| AU-DaS | SAV | -14.16 | 131.39 | 21 | 16.4 |  | 27.22 | 975.82 | 01~14 | Cernusak et al. (2011) |
| AU-Dry | SAV | -15.26 | 132.37 | 15 | 12.1 |  |  |  | 11~14 | Cernusak et al. (2011) |
| AU-Emr | GRA | -23.86 | 148.47 | 6.7 | 0.4 |  |  |  | 08~14 | Etheridge et al. (2014) |
| AU-Gin | WSA | -31.38 | 115.71 | 15 | 6.3 |  |  |  | 01~14 | Van Gorsel et al. (2016) |
| AU-How | WSA | -12.49 | 131.15 | 23 | 18.6 |  | 27.01 | 1449.35 | 05~08 | Livesley et al. (2011) |
| AU-Rig | GRA | -36.65 | 145.58 | 2.5 | 0.2 |  |  |  | 11~14 | Azmi et al. (2016) |
| AU-Stp | GRA | -17.15 | 133.35 | 4.8 | 0.7 |  |  |  | 10~12 | Cernusak et al. (2011) |
| AU-Tum | EBF | -35.66 | 148.15 | 70 | 40.0 | 1200 | 10.72 | 1159.01 | 12~14 | Leuning et al. (2005) |
| AU-Wac | EBF | -37.43 | 145.19 | 95 | 80.0 |  | 12.76 | 1105.59 | 04~14 | Kilinc et al. (2013) |
| AU-Whr | EBF | -36.67 | 145.03 | 32 | 24.4 |  |  |  | 96~14 | Van Gorsel et al. (2016) |
| AU-Wom | EBF | -37.42 | 144.09 | 30 | 25.0 | 705 |  |  | 00~04 | Fest et al. (2015) |
| AU-Ync | GRA | -34.99 | 146.29 | 8 | 0.4 |  |  |  | 03~10 | Yee et al. (2015) |
| BE-Lon | CRO | 50.55 | 4.75 | 2.7 | 0.6 | 167 | 10 | 800 | 03~06 | Suleau et al. (2011) |
| BE-Vie | MF | 50.31 | 6.00 | 40 | 27.9 | 493 | 7.8 | 1062 | 01~05 | Aubinet et al. (2003) |
| BR-Sa3 | EBF | -3.02 | -54.97 | 64 | 37.5 | 100 | 26.12 | 2043.77 | 05~14 | Miller et al. (2008) |
| CA-Qfo | ENF | 49.69 | -74.34 | 24 | 13.8 | 382 | -0.36 | 962.32 | 97~14 | Bergeron et al. (2007) |
| CA-SF1 | ENF | 54.49 | -105.82 | 12 | 6.0 | 536 | 0.4 | 470 | 05~14 | Mkhabela et al. (2009) |
| CA-SF2 | ENF | 54.25 | -105.88 | 10 | 4.0 | 520 | 0.4 | 470 | 07~10 | Mkhabela et al. (2009) |
| CH-Cha | GRA | 47.21 | 8.41 | 2.41 | 0.6 | 393 | 9.5 | 1136 | 01~14 | Zeeman et al. (2010) |
| CH-Dav | ENF | 46.82 | 9.86 | 35 | 19.8 | 1639 | 2.8 | 1062 | 04~14 | Zielis et al. (2014) |
| CH-Fru | GRA | 47.12 | 8.54 | 2.55 | 0.8 | 982 | 7.2 | 1651 | 00~12 | Zeeman et al. (2010) |
| CN-Cng | GRA | 44.59 | 123.51 | 2.55 | 0.2 |  |  |  | 04~14 | sites.fluxdata.org/CN-Cng |
| DE-Geb | CRO | 51.10 | 10.91 | 6 | 0.7 | 161.5 | 8.5 | 470 | 09~13 | Anthoni et al. (2004) |
| DE-Gri | GRA | 50.95 | 13.51 | 3 | 0.5 | 385 | 7.8 | 901 | 08~14 | Hussain et al. (2011) |
| DE-Hai | DBF | 51.08 | 10.45 | 43.5 | 30.3 | 430 | 8.3 | 720 | 07~10 | Ahrends et al. (2009) |
| DE-Kli | CRO | 50.89 | 13.52 | 3.5 | 0.6 | 478 | 7.6 | 842 | 96~14 | Prescher et al. (2010b) |
| DE-Lkb | ENF | 49.10 | 13.30 | 9 | 2.0 | 1308 | 4 | 1599 | 96~14 | Mauder et al. (2013) |
| DE-Obe | ENF | 50.79 | 13.72 | 30 | 16.0 | 734 | 5.5 | 996 | 96~14 | Zimmermann et al. (2006) |
| DE-Seh | CRO | 50.87 | 6.45 | 3 | 0.7 | 103 | 9.9 | 693 | 00~03 | Schmidt et al. (2012) |
| DE-Tha | ENF | 50.96 | 13.57 | 42 | 26.5 | 385 | 8.2 | 843 | 01~14 | Prescher et al. (2010a) |
| DK-Sor | DBF | 55.49 | 11.64 | 57 | 25.0 | 40 | 8.2 | 660 | 04~13 | Granier et al. (2002) |
| FI-Hyy | ENF | 61.85 | 24.29 | 23 | 13.0 | 181 | 3.8 | 709 | 96~08 | Vesala et al. (2005) |
| FI-Jok | CRO | 60.90 | 23.51 | 3 | 0.2 | 109 | 4.6 | 627 | 04~14 | Lohila et al. (2004) |
| FI-Sod | ENF | 67.36 | 26.64 | 48 | 33.4 | 180 | -1 | 500 | 11~14 | MÄkelÄ et al. (2008) |
| FR-Gri | CRO | 48.84 | 1.95 | 3.17 | 0.6 | 125 | 12 | 650 | 11~14 | Loubet et al. (2011) |
| FR-LBr | ENF | 44.72 | -0.77 | 38 | 15.9 | 61 | 13.6 | 900 | 11~14 | Hibbard et al. (2005) |
| GF-Guy | EBF | 5.28 | -52.92 | 58 | 35 | 48 | 25.7 | 3041 | 96~14 | Bonal et al. (2008) |
| IT-CA1 | DBF | 42.38 | 12.03 | 6.7 | 3 | 200 | 14 | 766 | 12~14 | Sabbatini et al. (2016) |
| IT-CA2 | CRO | 42.38 | 12.03 | 3.2 | 0.4 | 200 | 14 | 766 | 97~09 | Sabbatini et al. (2016) |
| IT-CA3 | DBF | 42.38 | 12.02 | 5.5 | 2.9 | 197 | 14 | 766 | 03~14 | Sabbatini et al. (2016) |
| IT-Col | DBF | 41.85 | 13.59 | 25.2 | 20.2 | 1560 | 6.3 | 1180 | 03~13 | Valentini et al. (1996) |
| IT-Cp2 | EBF | 41.70 | 12.36 | 19.7 | 14.9 | 19 | 15.2 | 805 | 04~14 | Fares et al. (2014) |
| IT-Cpz | EBF | 41.71 | 12.38 | 15 | 10.0 | 68 | 15.6 | 780 | 02~04 | Reichstein et al. (2002) |
| IT-Lav | ENF | 45.96 | 11.28 | 33 | 34.0 | 1353 | 7.8 | 1291 | 98~13 | Wei et al. (2014) |
| IT-MBo | GRA | 46.01 | 11.05 | 2.5 | 0.3 | 1550 | 5.1 | 1214 | 02~12 | Marcolla and Cescatti (2005) |
| IT-Noe | CSH | 40.61 | 8.15 | 3 | 2.0 | 25 | 15.9 | 588 | 99~12 | Reichstein et al. (2003) |
| IT-PT1 | DBF | 45.20 | 9.06 | 30 | 27.3 | 60 | 12.7 | 984 | 08~14 | Migliavacca et al. (2009) |
| IT-Ren | ENF | 46.59 | 11.43 | 30 | 25.4 | 1730 | 4.7 | 809.3 | 96~13 | Moderow et al. (2011) |
| IT-Ro2 | DBF | 42.39 | 11.92 | 20 | 14.0 | 160 | 15.15 | 876.2 | 98~14 | Gioli et al. (2004) |
| IT-SRo | ENF | 43.73 | 10.28 | 23.5 | 18.6 | 6 | 14.2 | 920 | 02~04 | Chiesi et al. (2005) |
| IT-Tor | GRA | 45.84 | 7.58 | 2.5 | 1.1 | 2160 | 2.9 | 920 | 05~09 | Galvagno et al. (2013) |
| NL-Loo | ENF | 52.17 | 5.74 | 24 | 14.0 | 25 | 9.8 | 786 | 09~12 | Gioli et al. (2004) |
| RU-Fyo | ENF | 56.46 | 32.92 | 48 | 44.1 | 265 | 3.9 | 711 | 09~12 | Moureaux et al. (2008) |
| RU-Ha1 | GRA | 54.73 | 90.00 | 4.5 | 0.2 | 446 | -0.07 | 591.87 | 03~12 | Belelli Marchesini et al. (2007) |
| SD-Dem | SAV | 13.28 | 30.48 | 2.5 | 0.7 | 500 | 26 | 320 | 97~07 | Ardö et al. (2008) |
| US-AR1 | GRA | 36.43 | -99.42 | 2.84 | 0.5 | 611 |  |  | 04~14 | Holmes et al. (2016) |
| US-AR2 | GRA | 36.64 | -99.60 | 2.95 | 0.2 | 646 |  |  | 03~06 | Schmidt et al. (2011) |
| US-ARM | CRO | 36.61 | -97.49 | 4 | 0.5 | 314 | 14.76 | 843 | 02~14 | Fischer et al. (2007) |
| US-Blo | ENF | 38.90 | -120.63 | 12 | 7.0 | 1315 | 11.09 | 1226 | 99~14 | Goldstein et al. (2004) |
| US-GLE | ENF | 41.37 | -106.24 | 23 | 15.1 | 3197 | 0.8 | 1200 | 01~13 | Bradford et al. (2008) |
| US-KS2 | CSH | 28.61 | -80.67 | 3.5 | 1.5 | 3 | 21.66 | 1294 | 01~13 | Powell et al. (2006) |
| US-Me2 | ENF | 44.45 | -121.56 | 29 | 16.6 | 1253 | 6.28 | 523 | 01~13 | Thomas et al. (2009) |
| US-MMS | DBF | 39.32 | -86.41 | 46 | 26.0 | 275 | 10.85 | 1032 | 98~14 | Schmid et al. (2000) |
| US-Ne1 | CRO | 41.17 | -96.48 | 6 | 1.0 | 361 | 10.07 | 790.37 | 08~14 | Verma et al. (2005) |
| US-Ne2 | CRO | 41.16 | -96.47 | 6 | 1.8 | 362 | 10.08 | 788.89 | 04~14 | Verma et al. (2005) |
| US-Ne3 | CRO | 41.18 | -96.44 | 6 | 1.0 | 363 | 10.11 | 783.68 | 01~14 | Verma et al. (2005) |
| US-NR1 | ENF | 40.03 | -105.55 | 26 | 11.5 | 3050 | 1.5 | 800 | 01~14 | Albert et al. (2017) |
| US-SRG | GRA | 31.79 | -110.83 | 3.25 | 0.5 | 1291 | 17 | 420 | 00~14 | Scott et al. (2015) |
| US-SRM | WSA | 31.82 | -110.87 | 6.4 | 2.5 | 1120 | 17.92 | 380 | 07~14 | Scott et al. (2009) |
| US-Syv | MF | 46.24 | -89.35 | 36 | 22.0 | 540 | 3.81 | 826 | 00~14 | Tang et al. (2008) |
| US-Ton | WSA | 38.43 | -120.97 | 23 | 9.0 | 177 | 15.8 | 559 | 99~14 | Baldocchi et al. (2004) |
| US-UMB | DBF | 45.56 | -84.71 | 46 | 21.0 | 234 | 5.83 | 803 | 04~14 | Schmid et al. (2003) |
| US-UMd | DBF | 45.56 | -84.70 | 34 | 22 | 239 | 5.83 | 803 | 00~09 | Gough et al. (2013) |
| US-Var | GRA | 38.41 | -120.95 | 2 | 0.6 | 129 | 15.8 | 559 | 07~13 | Ryu et al. (2008) |
| US-WCr | DBF | 45.81 | -90.08 | 30 | 24.2 | 520 | 4.02 | 787 | 08~14 | Desai et al. (2005) |
| US-Wkg | GRA | 31.74 | -109.94 | 6.4 | 0.5 | 1531 | 15.64 | 407 | 08~14 | Scott et al. (2010) |
| ZM-Mon | DBF | -15.44 | 23.25 | 33 | 18.2 | 1053 | 25 | 945 | 11~13 | Merbold et al. (2011) |

# Reference

Ahrends, H. E., Etzold, S., Kutsch, W. L., Stöckli, R., Brügger, R., Jeanneret, F., Wanner, H., Buchmann, N., and Eugster, W.: Tree phenology and carbon dioxide fluxes: use of digital photography for process-based interpretation at the ecosystem scale, Climate Research, 39, 261-274, 2009.

Albert, L. P., Keenan, T. F., Burns, S. P., Huxman, T. E., and Monson, R. K.: Climate controls over ecosystem metabolism: insights from a fifteen-year inductive artificial neural network synthesis for a subalpine forest, Oecologia, 184, 25-41, 2017.

Anthoni, P. M., Freibauer, A., Kolle, O., and Schulze, E.-D.: Winter wheat carbon exchange in Thuringia, Germany, Agricultural and Forest Meteorology, 121, 55-67, 2004.

Ardö, J., Mölder, M., El-Tahir, B. A., and Elkhidir, H. A. M.: Seasonal variation of carbon fluxes in a sparse savanna in semi arid Sudan, Carbon balance and management, 3, 7, 2008.

Aubinet, M., Heinesch, B., and Yernaux, M.: Horizontal and vertical CO 2 advection in a sloping forest, Boundary-Layer Meteorology, 108, 397-417, 2003.

Azmi, M., Rüdiger, C., and Walker, J. P.: Statistical analysis of short-term water stress conditions at Riggs Creek OzFlux tower site, Theoretical and Applied Climatology, 1-13, 2016.

Baldocchi, D. D., Xu, L., and Kiang, N.: How plant functional-type, weather, seasonal drought, and soil physical properties alter water and energy fluxes of an oak–grass savanna and an annual grassland, Agricultural and Forest Meteorology, 123, 13-39, 2004.

Barraza, V., Restrepo-Coupe, N., Huete, A., Grings, F., Beringer, J., Cleverly, J., and Eamus, D.: Estimation of latent heat flux over savannah vegetation across the North Australian Tropical Transect from multiple sensors and global meteorological data, Agricultural and Forest Meteorology, 232, 689-703, 2017.

Belelli Marchesini, L., Papale, D., Reichstein, M., Vuichard, N., Tchebakova, N., and Valentini, R.: Carbon balance assessment of a natural steppe of southern Siberia by multiple constraint approach, Biogeosciences, 4, 581-595, 2007.

Bergeron, O., Margolis, H. A., Black, T. A., Coursolle, C., Dunn, A. L., Barr, A. G., and Wofsy, S. C.: Comparison of carbon dioxide fluxes over three boreal black spruce forests in Canada, Global Change Biology, 13, 89-107, 2007.

Bonal, D., Bosc, A., Ponton, S., GORET, J. Y., Burban, B., Gross, P., BONNEFOND, J., Elbers, J., Longdoz, B., and Epron, D.: Impact of severe dry season on net ecosystem exchange in the Neotropical rainforest of French Guiana, Global Change Biology, 14, 1917-1933, 2008.

Bradford, J. B., Birdsey, R. A., Joyce, L. A., and Ryan, M. G.: Tree age, disturbance history, and carbon stocks and fluxes in subalpine Rocky Mountain forests, Global change biology, 14, 2882-2897, 2008.

Cernusak, L. A., Hutley, L. B., Beringer, J., Holtum, J. A., and Turner, B. L.: Photosynthetic physiology of eucalypts along a sub-continental rainfall gradient in northern Australia, Agricultural and Forest Meteorology, 151, 1462-1470, 2011.

Chiesi, M., Maselli, F., Bindi, M., Fibbi, L., Cherubini, P., Arlotta, E., Tirone, G., Matteucci, G., and Seufert, G.: Modelling carbon budget of Mediterranean forests using ground and remote sensing measurements, Agricultural and Forest Meteorology, 135, 22-34, 2005.

Desai, A. R., Bolstad, P. V., Cook, B. D., Davis, K. J., and Carey, E. V.: Comparing net ecosystem exchange of carbon dioxide between an old-growth and mature forest in the upper Midwest, USA, Agricultural and Forest Meteorology, 128, 33-55, 2005.

Etheridge, D., Gregory, R., Allison, C., Kuske, T., Berko, H., Schroder, I., Loh, Z., Feitz, A. J., Hibberd, M., and Zegelin, S.: Metadata report: Arcturus atmospheric greenhouse gas monitoring, Geoscience Australia2014.

Fares, S., Savi, F., Muller, J., Matteucci, G., and Paoletti, E.: Simultaneous measurements of above and below canopy ozone fluxes help partitioning ozone deposition between its various sinks in a Mediterranean Oak Forest, Agricultural and forest meteorology, 198, 181-191, 2014.

Fest, B. J., Livesley, S. J., von Fischer, J. C., and Arndt, S. K.: Repeated fuel reduction burns have little long-term impact on soil greenhouse gas exchange in a dry sclerophyll eucalypt forest, Agricultural and Forest Meteorology, 201, 17-25, 2015.

Fischer, M. L., Billesbach, D. P., Berry, J. A., Riley, W. J., and Torn, M. S.: Spatiotemporal variations in growing season exchanges of CO2, H2O, and sensible heat in agricultural fields of the Southern Great Plains, Earth Interactions, 11, 1-21, 2007.

Galvagno, M., Wohlfahrt, G., Cremonese, E., Rossini, M., Colombo, R., Filippa, G., Julitta, T., Manca, G., Siniscalco, C., and di Cella, U. M.: Phenology and carbon dioxide source/sink strength of a subalpine grassland in response to an exceptionally short snow season, Environmental Research Letters, 8, 025008, 2013.

Gilmanov, T., Soussana, J., Aires, L., Allard, V., Ammann, C., Balzarolo, M., Barcza, Z., Bernhofer, C., Campbell, C., and Cernusca, A.: Partitioning European grassland net ecosystem CO 2 exchange into gross primary productivity and ecosystem respiration using light response function analysis, Agriculture, ecosystems & environment, 121, 93-120, 2007.

Gioli, B., Miglietta, F., De Martino, B., Hutjes, R. W., Dolman, H. A., Lindroth, A., Schumacher, M., Sanz, M. J., Manca, G., and Peressotti, A.: Comparison between tower and aircraft-based eddy covariance fluxes in five European regions, Agricultural and Forest Meteorology, 127, 1-16, 2004.

Goldstein, A., McKay, M., Kurpius, M., Schade, G., Lee, A., Holzinger, R., and Rasmussen, R.: Forest thinning experiment confirms ozone deposition to forest canopy is dominated by reaction with biogenic VOCs, Geophysical research letters, 31, 2004.

Gough, C. M., Hardiman, B. S., Nave, L. E., Bohrer, G., Maurer, K. D., Vogel, C. S., Nadelhoffer, K. J., and Curtis, P. S.: Sustained carbon uptake and storage following moderate disturbance in a Great Lakes forest, Ecological Applications, 23, 1202-1215, 2013.

Granier, A., Pilegaard, K., and Jensen, N.: Similar net ecosystem exchange of beech stands located in France and Denmark, Agricultural and Forest Meteorology, 114, 75-82, 2002.

Hibbard, K., Law, B., Reichstein, M., and Sulzman, J.: An analysis of soil respiration across northern hemisphere temperate ecosystems, Biogeochemistry, 73, 29-70, 2005.

Holmes, T. R., Hain, C. R., Anderson, M. C., and Crow, W. T.: Cloud tolerance of remote-sensing technologies to measure land surface temperature, Hydrology and Earth System Sciences, 20, 3263, 2016.

Hussain, M., Grünwald, T., Tenhunen, J., Li, Y., Mirzae, H., Bernhofer, C., Otieno, D., Dinh, N., Schmidt, M., and Wartinger, M.: Summer drought influence on CO 2 and water fluxes of extensively managed grassland in Germany, Agriculture, ecosystems & environment, 141, 67-76, 2011.

Kilinc, M., Beringer, J., Hutley, L. B., Tapper, N. J., and McGuire, D. A.: Carbon and water exchange of the world's tallest angiosperm forest, Agricultural and forest meteorology, 182, 215-224, 2013.

Leuning, R., Cleugh, H. A., Zegelin, S. J., and Hughes, D.: Carbon and water fluxes over a temperate Eucalyptus forest and a tropical wet/dry savanna in Australia: measurements and comparison with MODIS remote sensing estimates, Agricultural and Forest Meteorology, 129, 151-173, 2005.

Livesley, S. J., Grover, S., Hutley, L. B., Jamali, H., Butterbach-Bahl, K., Fest, B., Beringer, J., and Arndt, S. K.: Seasonal variation and fire effects on CH 4, N 2 O and CO 2 exchange in savanna soils of northern Australia, Agricultural and Forest Meteorology, 151, 1440-1452, 2011.

Lohila, A., Aurela, M., Tuovinen, J. P., and Laurila, T.: Annual CO2 exchange of a peat field growing spring barley or perennial forage grass, Journal of Geophysical Research: Atmospheres, 109, 2004.

Loubet, B., Laville, P., Lehuger, S., Larmanou, E., Fléchard, C., Mascher, N., Genermont, S., Roche, R., Ferrara, R. M., and Stella, P.: Carbon, nitrogen and Greenhouse gases budgets over a four years crop rotation in northern France, Plant and Soil, 343, 109, 2011.

MÄKELÄ, A., Pulkkinen, M., Kolari, P., Lagergren, F., Berbigier, P., Lindroth, A., Loustau, D., Nikinmaa, E., Vesala, T., and Hari, P.: Developing an empirical model of stand GPP with the LUE approach: analysis of eddy covariance data at five contrasting conifer sites in Europe, Global Change Biology, 14, 92-108, 2008.

Marcolla, B. and Cescatti, A.: Experimental analysis of flux footprint for varying stability conditions in an alpine meadow, Agricultural and Forest Meteorology, 135, 291-301, 2005.

Mauder, M., Cuntz, M., Drüe, C., Graf, A., Rebmann, C., Schmid, H. P., Schmidt, M., and Steinbrecher, R.: A strategy for quality and uncertainty assessment of long-term eddy-covariance measurements, Agricultural and Forest Meteorology, 169, 122-135, 2013.

Merbold, L., Ziegler, W., Mukelabai, M., and Kutsch, W.: Spatial and temporal variation of CO 2 efflux along a disturbance gradient in a miombo woodland in Western Zambia, Biogeosciences, 8, 147-164, 2011.

Migliavacca, M., Meroni, M., Busetto, L., Colombo, R., Zenone, T., Matteucci, G., Manca, G., and Seufert, G.: Modeling gross primary production of agro-forestry ecosystems by assimilation of satellite-derived information in a process-based model, Sensors, 9, 922-942, 2009.

Miller, S. D., de Sousa, C. A. D., Menton, M. C., Maia, A. R., da Rocha, H. R., and Goulden, M. L.: Effects of selective logging on tropical forest tree growth, Journal of Geophysical Research: Biogeosciences, 113, 2008.

Mkhabela, M., Amiro, B., Barr, A., Black, T., Hawthorne, I., Kidston, J., McCaughey, J., Orchansky, A., Nesic, Z., and Sass, A.: Comparison of carbon dynamics and water use efficiency following fire and harvesting in Canadian boreal forests, Agricultural and Forest Meteorology, 149, 783-794, 2009.

Moderow, U., Feigenwinter, C., and Bernhofer, C.: Non-turbulent fluxes of carbon dioxide and sensible heat—A comparison of three forested sites, Agricultural and forest meteorology, 151, 692-708, 2011.

Moureaux, C., Bodson, B., and Aubinet, M.: Mesure des flux de CO2 et bilan carboné de grandes cultures: état de la question et méthodologie, Biotechnologie, Agronomie, Société et Environnement, 12, 303-315, 2008.

Powell, T. L., Bracho, R., Li, J., Dore, S., Hinkle, C. R., and Drake, B. G.: Environmental controls over net ecosystem carbon exchange of scrub oak in central Florida, Agricultural and Forest Meteorology, 141, 19-34, 2006.

Prescher, A.-K., Grünwald, T., and Bernhofer, C.: Land use regulates carbon budgets in eastern Germany: From NEE to NBP, Agricultural and Forest Meteorology, 150, 1016-1025, 2010a.

Prescher, A.-K., Grünwald, T., and Bernhofer, C.: Land use regulates carbon budgets in eastern Germany: From NEE to NBP, Agricultural and Forest Meteorology, 150, 1016-1025, 2010b.

Reichstein, M., Tenhunen, J. D., Roupsard, O., Ourcival, J. M., Rambal, S., Dore, S., and Valentini, R.: Ecosystem respiration in two Mediterranean evergreen Holm Oak forests: drought effects and decomposition dynamics, Functional Ecology, 16, 27-39, 2002.

Reichstein, M., Tenhunen, J., Roupsard, O., Ourcival, J. M., Rambal, S., Miglietta, F., Peressotti, A., Pecchiari, M., Tirone, G., and Valentini, R.: Inverse modeling of seasonal drought effects on canopy CO2/H2O exchange in three Mediterranean ecosystems, Journal of Geophysical Research: Atmospheres, 108, 2003.

Ryu, Y., Baldocchi, D. D., Ma, S., and Hehn, T.: Interannual variability of evapotranspiration and energy exchange over an annual grassland in California, Journal of Geophysical Research: Atmospheres, 113, 2008.

Sabbatini, S., Arriga, N., Bertolini, T., Castaldi, S., Chiti, T., Consalvo, C., Djomo, S. N., Gioli, B., Matteucci, G., and Papale, D.: Greenhouse gas balance of cropland conversion to bioenergy poplar short-rotation coppice, Biogeosciences, 13, 95, 2016.

Schmid, H., Su, H. B., Vogel, C., and Curtis, P.: Ecosystem‐atmosphere exchange of carbon dioxide over a mixed hardwood forest in northern lower Michigan, Journal of Geophysical Research: Atmospheres, 108, 2003.

Schmid, H. P., Grimmond, C. S. B., Cropley, F., Offerle, B., and Su, H.-B.: Measurements of CO 2 and energy fluxes over a mixed hardwood forest in the mid-western United States, Agricultural and Forest Meteorology, 103, 357-374, 2000.

Schmidt, M., Reichenau, T. G., Fiener, P., and Schneider, K.: The carbon budget of a winter wheat field: An eddy covariance analysis of seasonal and inter-annual variability, Agricultural and Forest Meteorology, 165, 114-126, 2012.

Schmidt, M. W., Torn, M. S., Abiven, S., Dittmar, T., Guggenberger, G., Janssens, I. A., Kleber, M., Kögel-Knabner, I., Lehmann, J., and Manning, D. A.: Persistence of soil organic matter as an ecosystem property, Nature, 478, 49, 2011.

Scott, R. L., Biederman, J. A., Hamerlynck, E. P., and Barron‐Gafford, G. A.: The carbon balance pivot point of southwestern US semiarid ecosystems: Insights from the 21st century drought, Journal of Geophysical Research: Biogeosciences, 120, 2612-2624, 2015.

Scott, R. L., Jenerette, G. D., Potts, D. L., and Huxman, T. E.: Effects of seasonal drought on net carbon dioxide exchange from a woody‐plant‐encroached semiarid grassland, Journal of Geophysical Research: Biogeosciences, 114, 2009.

Scott, R. L., Hamerlynck, E. P., Jenerette, G. D., Moran, M. S., and Barron‐Gafford, G. A.: Carbon dioxide exchange in a semidesert grassland through drought‐induced vegetation change, Journal of Geophysical Research: Biogeosciences, 115, 2010.

Suleau, M., Moureaux, C., Dufranne, D., Buysse, P., Bodson, B., Destain, J.-P., Heinesch, B., Debacq, A., and Aubinet, M.: Respiration of three Belgian crops: partitioning of total ecosystem respiration in its heterotrophic, above-and below-ground autotrophic components, Agricultural and forest meteorology, 151, 633-643, 2011.

Tang, J., Bolstad, P. V., Desai, A. R., Martin, J. G., Cook, B. D., Davis, K. J., and Carey, E. V.: Ecosystem respiration and its components in an old-growth forest in the Great Lakes region of the United States, Agricultural and Forest Meteorology, 148, 171-185, 2008.

Thomas, C. K., Law, B. E., Irvine, J., Martin, J. G., Pettijohn, J. C., and Davis, K. J.: Seasonal hydrology explains interannual and seasonal variation in carbon and water exchange in a semiarid mature ponderosa pine forest in central Oregon, Journal of Geophysical Research: Biogeosciences, 114, 2009.

Ulke, A. G., Gattinoni, N. N., and Posse, G.: Analysis and modelling of turbulent fluxes in two different ecosystems in Argentina, International Journal of Environment and Pollution, 58, 52-62, 2015.

Valentini, R., Angelis, P. d., Matteucci, G., Monaco, R., Dore, S., and Mucnozza, G. S.: Seasonal net carbon dioxide exchange of a beech forest with the atmosphere, Global Change Biology, 2, 199-207, 1996.

van Gorsel, E., Wolf, S., James Cleverly, J., Isaac, P., Haverd, V., Ewenz, C., Arndt, S., Beringer, J., Resco de Dios, V., and Evans, B. J.: Carbon uptake and water use in woodlands and forests in southern Australia during an extreme heat wave event in the “Angry Summer” of 2012/2013, Biogeosciences, 2016, vol. 13, núm. 21, p. 5947-5964, 2016.

Verma, S. B., Dobermann, A., Cassman, K. G., Walters, D. T., Knops, J. M., Arkebauer, T. J., Suyker, A. E., Burba, G. G., Amos, B., and Yang, H.: Annual carbon dioxide exchange in irrigated and rainfed maize-based agroecosystems, Agricultural and Forest Meteorology, 131, 77-96, 2005.

Vesala, T., Suni, T., Rannik, Ü., Keronen, P., Markkanen, T., Sevanto, S., Grönholm, T., Smolander, S., Kulmala, M., and Ilvesniemi, H.: Effect of thinning on surface fluxes in a boreal forest, Global Biogeochemical Cycles, 19, 2005.

Wei, S., Yi, C., Hendrey, G., Eaton, T., Rustic, G., Wang, S., Liu, H., Krakauer, N. Y., Wang, W., and Desai, A. R.: Data-based perfect-deficit approach to understanding climate extremes and forest carbon assimilation capacity, Environmental Research Letters, 9, 065002, 2014.

Yee, M. S., Pauwels, V. R., Daly, E., Beringer, J., Rüdiger, C., McCabe, M. F., and Walker, J. P.: A comparison of optical and microwave scintillometers with eddy covariance derived surface heat fluxes, Agricultural and forest meteorology, 213, 226-239, 2015.

Zeeman, M. J., Hiller, R., Gilgen, A. K., Michna, P., Plüss, P., Buchmann, N., and Eugster, W.: Management and climate impacts on net CO 2 fluxes and carbon budgets of three grasslands along an elevational gradient in Switzerland, Agricultural and Forest Meteorology, 150, 519-530, 2010.

Zhuang, W., Cheng, L., Whitley, R., Shi, H., Beringer, J., Wang, Y., He, L., Cleverly, J., Eamus, D., and Yu, Q.: How energy and water availability constrain vegetation water-use along the North Australian Tropical Transect, International Journal of Plant Production, 10, 2016.

Zielis, S., Etzold, S., Zweifel, R., Eugster, W., Haeni, M., and Buchmann, N.: NEP of a Swiss subalpine forest is significantly driven not only by current but also by previous year's weather, Biogeosciences, 11, 1627, 2014.

Zimmermann, F., Plessow, K., Queck, R., Bernhofer, C., and Matschullat, J.: Atmospheric N-and S-fluxes to a spruce forest—Comparison of inferential modelling and the throughfall method, Atmospheric Environment, 40, 4782-4796, 2006.
