# Supplementary material for: CAMELE: Collocation-Analyzed Multi-source Ensembled Land Evapotranspiration Data
Source: Copernicus journal article supplement (doi:10.5194/essd-2021-456), 2022-03-01
Supplement: Supplementary file 3 [file S3-Calculation combinations for inputs evaluation.docx]

**Error Characterization of Global Land Evapotranspiration Products: A Collocation approach**

Changming Li1, Hanbo Yang1*, Wencong Yang1, Ziwei Liu1, Yao Jia1, Sien Li2, Dawen Yang1

1State Key Laboratory of Hydroscience and Engineering, Department of Hydraulic Engineering, Tsinghua University. Beijing 100084, China

2Center for Agricultural Water Research in China, China Agricultural University, Beijing 100083, China

*Correspondence: Hanbo Yang ([yanghanbo@tsinghua.edu.cn](mailto:yanghanbo@tsinghua.edu.cn) )

# S3: Calculation combinations for inputs evaluation

Different methods can also be categorized by number of inputs: (1) Dual inputs (IVS/IVD); (2) Triple inputs (TC/EIVD); (3) Quadruple inputs (QC). For dual-input methods, IVS required the selection of product to derive the lag-1 series as the third input, while IVD used the lag-1 variances of both products. For triple-input methods, EIVD required the identification of two products with non-zero error-correlation-covariance, while TC assumed all three products were mutual-independent. For quadruple-input method, the requirement of QC was the same as EIVD. In our study, both additive and multiplicative models were considered. The number of total combination scenarios are listed in the following table:

**TABLE** Number of combination scenarios for different methods over three resolutions using selected error-structure model

|  | 01°/8-daily | | | 025°/8-daily | | | | | 025°/daily | | |
| --- | --- | --- | --- | --- | --- | --- | --- | --- | --- | --- | --- |
| Products | ERA5 | FLUXCOM | PMLV2 | ERA5 | GLEAM | GLDAS | FLUXCOM | PMLV2 | ERA5 | GLEAM | GLDAS |
| IVS |  | | |  | | | | |  | | |
| IVD |  | | |  | | | | |  | | |
| TC |  | | |  | | | | |  | | |
| EIVD |  | | |  | | | | |  | | |
| QC |  | | |  | | | | |  | | |

**(1) 01°/8-Daily: ERA5/FLUXCOM/PMLV2**

**IVS：, Each: , Total: 12**

| ***Resolution/Method*** | | | | | | | | |
| --- | --- | --- | --- | --- | --- | --- | --- | --- |
| 0.1° | | | 8-Daily | | | IVS | | |
| ***Available data*** | | | | | | | | |
| ERA5 | | | FLUXCOM | | | PMLV2 | | |
|  | ***S1*** | ***S2*** | | ***S3*** | ***S4*** | | ***S5*** | ***S6*** |
| ***Data1*** | ERA5 | ERA5 | | FLUXCOM | FLUXCOM | | PMLV2 | PMLV2 |
| ***Data2(Lag)*** | FLUXCOM | PMLV2 | | ERA5 | PMLV2 | | ERA5 | FLUXCOM |

**IVD: , Each: , Total: 6**

| ***Resolution/Method*** | | | | | |
| --- | --- | --- | --- | --- | --- |
| 0.1° | | 8-Daily | | IVD | |
| ***Available data*** | | | | | |
| ERA5 | | FLUXCOM | | PMLV2 | |
|  | ***S1*** | | ***S2*** | | ***S3*** |
| ***Data1*** | ERA5 | | ERA5 | | FLUXCOM |
| ***Data2*** | FLUXCOM | | PMLV2 | | PMLV2 |

**TC: , Each: 1, Total: 3**

| ***Resolution/Method*** | | |
| --- | --- | --- |
| 0.1° | 8-Daily | TC |
| ***Available data*** | | |
| ERA5 | FLUXCOM | PMLV2 |

**EIVD: , ECC: , Each: , Total: 12**

| ***Resolution/Method*** | | | | | |
| --- | --- | --- | --- | --- | --- |
| 0.1° | | 8-Daily | | EIVD | |
| ***Available data*** | | | | | |
| ERA5 | | FLUXCOM | | PMLV2 | |
|  | ***S1*** | | ***S2*** | | ***S3*** |
| ***Data1*** | ERA5 | | FLUXCOM | | PMLV2 |
| ***Data2*** | FLUXCOM | | ERA5 | | FLUXCOM |
| ***Data3*** | PMLV2 | | PMLV2 | | ERA5 |
|  |  | | | | |

**(2) 025°/Daily: ERA5/GLEAM/GLDAS**

**IVS：, Each: , Total: 12**

| ***Resolution/Method*** | | | | | | | | |
| --- | --- | --- | --- | --- | --- | --- | --- | --- |
| 0.25° | | | Daily | | | IVS | | |
| ***Available data*** | | | | | | | | |
| ERA5 | | | GLEAM | | | GLDAS | | |
|  | ***S1*** | ***S2*** | | ***S3*** | ***S4*** | | ***S5*** | ***S6*** |
| ***Data1*** | ERA5 | ERA5 | | GLEAM | GLEAM | | GLDAS | GLDAS |
| ***Data2(Lag)*** | GLEAM | GLDAS | | ERA5 | GLDAS | | ERA5 | GLEAM |

**IVD: , Each: , Total: 6**

| ***Resolution/Method*** | | | | | |
| --- | --- | --- | --- | --- | --- |
| 0.25° | | Daily | | IVD | |
| ***Available data*** | | | | | |
| ERA5 | | GLEAM | | GLDAS | |
|  | ***S1*** | | ***S2*** | | ***S3*** |
| ***Data1*** | ERA5 | | ERA5 | | GLEAM |
| ***Data2*** | GLEAM | | GLDAS | | GLDAS |

**TC: , Each: 1, Total: 3**

| ***Resolution/Method*** | | |
| --- | --- | --- |
| 0.25° | Daily | TC |
| ***Available data*** | | |
| ERA5 | GLEAM | GLDAS |

**EIVD: , ECC: , Each: , Total: 12**

| ***Resolution/Method*** | | | | | |
| --- | --- | --- | --- | --- | --- |
| 0.25° | | Daily | | EIVD | |
| ***Available data*** | | | | | |
| ERA5 | | GLEAM | | GLDAS | |
|  | ***S1*** | | ***S2*** | | ***S3*** |
| ***Data1*** | ERA5 | | FLUXCOM | | PMLV2 |
| ***Data2*** | GLEAM | | ERA5 | | GLEAM |
| ***Data3*** | GLDAS | | GLDAS | | ERA5 |
|  |  | | | | |

**(3) 025°/8-Daily: ERA5/GLEAM/GLDAS/FLUXCOM/PMLV2**

**IVS：, Each: , Total: 40**

| ***Resolution/Method*** | | | | | | | | | | | | |
| --- | --- | --- | --- | --- | --- | --- | --- | --- | --- | --- | --- | --- |
| 0.25° | | | | 8-Daily | | | | IVS | | | | |
| ***Available data*** | | | | | | | | | | | | |
| ERA5 | | GLEAM | | | GLDAS | | FLUXCOM | | | PMLV2 | | |
|  | ***S11&S12*** | | ***S21&S22*** | | | ***S31&S32*** | | | ***S41&S42*** | | ***S51&S52*** |
| ***Data1*** | ERA5 | | ERA5 | | | ERA5 | | | ERA5 | | GLEAM |
| ***Data2*** | GLEAM | | GLDAS | | | FLUXCOM | | | PMLV2 | | GLDAS |
|  | ***S61&S62*** | | ***S71&S72*** | | | ***S81&S82*** | | | ***S91&S92*** | | ***S101&S102*** |
| ***Data1*** | GLEAM | | GLEAM | | | GLDAS | | | GLDAS | | FLUXCOM |
| ***Data2*** | FLUXCOM | | PMLV2 | | | FLUXCOM | | | PMLV2 | | PMLV2 |

**IVD: , Each: , Total: 20**

| ***Resolution/Method*** | | | | | | | | | | | | |
| --- | --- | --- | --- | --- | --- | --- | --- | --- | --- | --- | --- | --- |
| 0.25° | | | | 8-Daily | | | | IVD | | | | |
| ***Available data*** | | | | | | | | | | | | |
| ERA5 | | GLEAM | | | GLDAS | | FLUXCOM | | | PMLV2 | | |
|  | ***S1*** | | ***S2*** | | | ***S3*** | | | ***S4*** | | ***S5*** |
| ***Data1*** | ERA5 | | ERA5 | | | ERA5 | | | ERA5 | | GLEAM |
| ***Data2*** | GLEAM | | GLDAS | | | FLUXCOM | | | PMLV2 | | GLDAS |
|  | ***S6*** | | ***S7*** | | | ***S8*** | | | ***S9*** | | ***S10*** |
| ***Data1*** | GLEAM | | GLEAM | | | GLDAS | | | GLDAS | | FLUXCOM |
| ***Data2*** | FLUXCOM | | PMLV2 | | | FLUXCOM | | | PMLV2 | | PMLV2 |

**TC: , Each: , Total: 30**

| ***Resolution/Method*** | | | | | | | | | |
| --- | --- | --- | --- | --- | --- | --- | --- | --- | --- |
| 0.25° | | | 8-Daily | | | | TC | | |
| ***Available data*** | | | | | | | | | |
| ERA5 | | GLEAM | | | GLDAS | | | FLUXCOM | PMLV2 |
|  | ***S1*** | | | ***S2*** | | ***S3*** | | ***S4*** | ***S5*** |
| ***Data1*** | ERA5 | | | ERA5 | | ERA5 | | ERA5 | ERA5 |
| ***Data2*** | GLEAM | | | GLEAM | | GLEAM | | GLDAS | GLDAS |
| ***Data3*** | GLDAS | | | FLUXCOM | | PMLV2 | | FLUXCOM | PMLV2 |
|  | ***S6*** | | | ***S7*** | | ***S8*** | | ***S9*** | ***S10*** |
| ***Data1*** | ERA5 | | | GLEAM | | GLEAM | | GLEAM | GLDAS |
| ***Data2*** | FLUXCOM | | | GLDAS | | GLDAS | | FLUXCOM | FLUXCOM |
| ***Data3*** | PMLV2 | | | FLUXCOM | | PMLV2 | | PMLV2 | PMLV2 |

**EIVD: , ECC: , Each: , Total: 120**

| ***Resolution/Method*** | | | | | | | | | | | |
| --- | --- | --- | --- | --- | --- | --- | --- | --- | --- | --- | --- |
| 0.25° | | | | 8-Daily | | | | EIVD | | | |
| ***Available data*** | | | | | | | | | | | |
| ERA5 | | GLEAM | | | GLDAS | | FLUXCOM | | | | PMLV2 |
|  | ***Data1*** | | ***Data2*** | | | ***Data3*** |  | |  |  | |
| ***S1*** | ERA5 | | GLEAM | | | GLDAS |  | |  |  | |
| ***S2*** | ERA5 | | GLEAM | | | FLUXCOM |
| ***S3*** | ERA5 | | GLEAM | | | PMLV2 |
| ***S4*** | ERA5 | | GLDAS | | | FLUXCOM |
| ***S5*** | ERA5 | | GLDAS | | | PMLV2 |
| ***S6*** | ERA5 | | FLUXCOM | | | PMLV2 |
| ***S7*** | GLEAM | | GLDAS | | | FLUXCOM |
| ***S8*** | GLEAM | | GLDAS | | | PMLV2 |
| ***S9*** | GLEAM | | FLUXCOM | | | PMLV2 |
| ***S10*** | GLDSA | | FLUXCOM | | | PMLV2 |

**QC: , ECC: , Each: , Total: 150**

| ***Resolution/Method*** | | | | | | | | | | | | | | | | | |
| --- | --- | --- | --- | --- | --- | --- | --- | --- | --- | --- | --- | --- | --- | --- | --- | --- | --- |
| 0.25° | | | | | 8daily | | | | | | QC | | | | | | |
| ***Available Data (0.1° resampled to 0.25°)*** | | | | | | | | | | | | | | | | | |
| ERA5 | | | GLDAS | | | | GLEAM | | FLUXCOM | | | | | PMLV2 | | | |
|  | ***Data1*** | ***Data2*** | | ***Data3*** | | ***Data4*** | |  | |  | |  |  | |  |  |
| ***S1*** | ERA5 | GLDAS | | GLEAM | | FLUXCOM | |  | |  | |  |  | |  |  |
| ***S2*** | ERA5 | GLDAS | | GLEAM | | PMLV2 | |
| ***S3*** | ERA5 | GLDAS | | FLUXCOM | | PMLV2 | |
| ***S4*** | ERA5 | GLEAM | | FLUXCOM | | PMLV2 | |
| ***S5*** | GLDAS | GLEAM | | FLUXCOM | | PMLV2 | |
